RESEARCH ARTICLE

# Wheat straw biochar-supported nanoscale zerovalent iron for removal of trichloroethylene from groundwater

Hui Li<sup>1</sup>, Ya Qin Chen<sup>1</sup>, Shuai Chen<sup>1</sup>, Xiao Li Wang<sup>1,2\*</sup>, Shu Guo<sup>3</sup>, Yue Feng Qiu<sup>1</sup>, Yong Di Liu<sup>1</sup>, Xiao Li Duan<sup>4</sup>, Yun Jiang Yu<sup>3\*</sup>

**1** State Environmental Protection Key Laboratory of Environmental Risk Assessment and Control on Chemical Process, School of Resources and Environmental Engineering, East China University of Science and Technology, Shanghai, P.R. China, **2** School of Bioengineering, East China University of Science and Technology, Shanghai, P.R. China, **3** Center of Environmental Health Research, South China Institute of Environmental Sciences, Guangzhou, P.R. China, **4** School of Energy and Environmental Engineering, University of Science and Technology Beijing, Beijing, China

\* [xlwang@ecust.edu.cn](mailto:xlwang@ecust.edu.cn) (XLW); [yuyunjiang@scies.org](mailto:yuyunjiang@scies.org) (YJY)

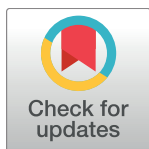

**OPEN ACCESS**

**Citation:** Li H, Chen YQ, Chen S, Wang XL, Guo S, Qiu YF, et al. (2017) Wheat straw biochar-supported nanoscale zerovalent iron for removal of trichloroethylene from groundwater. *PLoS ONE* 12 (3): e0172337. doi:10.1371/journal.pone.0172337

**Editor:** Jorge Paz-Ferreiro, RMIT University, AUSTRALIA

**Received:** March 7, 2016

**Accepted:** February 4, 2017

**Published:** March 6, 2017

**Copyright:** © 2017 Li et al. This is an open access article distributed under the terms of the [Creative Commons Attribution License](https://creativecommons.org/licenses/by/4.0/), which permits unrestricted use, distribution, and reproduction in any medium, provided the original author and source are credited.

**Data Availability Statement:** All relevant data are within the paper and its Supporting Information files.

**Funding:** The author, HL, received the funding jointly provided by National Natural Science Foundation of China (grant number: 41273109, 51378208, 51578240), <http://www.nsf.gov.cn/>; the National key research and development plan (2016YFC0206200), <http://service.most.gov.cn/>; Program for New Century Excellent Talents in University (grant number: NCET-13-0797), <http://www.moe.gov.cn/>; Fok Ying Tung Education

## Abstract

This study synthesized the wheat straw biochar-supported nanoscale zerovalent iron (BC-nZVI) via in-situ reduction with NaBH<sub>4</sub> and biochar pyrolyzed at 600°C. Wheat straw biochar, as a carrier, significantly enhanced the removal of trichloroethylene (TCE) by nZVI. The pseudo-first-order rate constant of TCE removal by BC-nZVI (1.079 h<sup>-1</sup>) within 260 min was 1.4 times higher and 539.5 times higher than that of biochar and nZVI, respectively. TCE was 79% dechlorinated by BC-nZVI within 15 h, but only 11% dechlorinated by unsupported nZVI, and no TCE dechlorination occurred with unmodified biochar. Weakly acidic solution (pH 5.7–6.8) significantly enhanced the dechlorination of TCE. Chloride enhanced the removal of TCE, while SO<sub>4</sub><sup>2-</sup>, HCO<sub>3</sub><sup>-</sup> and NO<sub>3</sub><sup>-</sup> all inhibited it. Humic acid (HA) inhibited BC-nZVI reactivity, but the inhibition decreased slightly as the concentration of HA increased from 40 mg·L<sup>-1</sup> to 80 mg·L<sup>-1</sup>, which was due to the electron shutting by HA aggregates. Results suggest that BC-nZVI was promising for remediation of TCE contaminated groundwater.

## Introduction

Trichloroethylene is a widespread and persistent contaminant of groundwater which poses a serious threat to groundwater environmental safety and human health[1]. Removal of TCE from groundwater is a challenging task considering the complex subsurface environment. Zerovalent iron (ZVI) has been effectively used to degrade halogenated organic compounds since 1994[2]. Recently, ZVI research has shifted to the nanoscale material[3], because ZVI is easily passivated and has a relatively slow reaction rate due to its large size[4]. In contrast, nanoscale zerovalent iron (nZVI) has high dechlorination rates and transform chlorinated solvents completely without accumulation of chlorinated byproducts[5,6]. However, there are still

Foundation (grant number: 141077), <http://www.cutech.edu.cn/cn/index.htm>; Innovation Program of Shanghai Municipal Education Commission (14ZZ059), <http://www.shmec.gov.cn/>; Innovation Program of Shanghai Municipal of Science and Technology Commission (grant number: 15DZ1205804), <http://www.stcsm.gov.cn/>; Fundamental Research Funds for the Central Universities (WB1313008, WB1516015, WB1616012), <http://www.moe.edu.cn/>. The funders had no role in study design, data collection and analysis, decision to publish, or preparation of the manuscript.

**Competing interests:** The authors have declared that no competing interests exist.

many factors that limit the application of nZVI, such as poor stability, poor mobility and potential ecotoxicity[7].

The biggest challenge facing the use of nZVI is its tendency to agglomerate, due to its high surface energy and magnetic interaction[8], which severely limits its stability and mobility in groundwater environments[9].

The main approaches for reducing nZVI aggregation include coating with organic polymer materials, including guar gum[10], carboxyl methyl cellulose (CMC)[11] and polyacrylic acid (PAA)[12], and inorganic adsorbent material, including sepiolite[13], smectite[14], alginate bead[15] and activated carbon[9,16]. Activated carbon materials can not only effectively decrease nZVI aggregation, but also rapidly increase the concentrations of contaminants in the micro environments surrounding nZVI because of its adsorption capacity[17]. Although activated carbon immobilizes nZVI and improves the TCE removal efficiency, its preparation consumes a lot of energy. An environmentally friendly support for nZVI with high adsorption capacity at a low cost would be highly desirable.

Biochar, a charcoal produced by heating biomass under anoxic conditions, attracts growing interest as a promising and environmentally-friendly support and adsorbent material[18]. Biochar has a porous structure and a large specific surface area and also possesses large numbers of oxygen-containing functional groups that are formed during the pyrolysis process. These characteristics suggest biochar may be used as an alternative to activated carbon to remove organic contaminants and heavy metals from fluids, such as Cu, pesticides and chlorophenol [19–22]. Recently, biochar produced from soybean stover, peanut shells and pine needles at various temperatures has been used to remove TCE from aqueous solutions[23,24]. The raw biomass and pyrolysis temperature significantly affect TCE adsorption[23]. On the other hand, biochar has also been used to immobilize (i.e., to disperse and stabilize) nanoparticles [25–27]. For example, Yan et al.[25] prepared nZVI supported by rice hull biochar and used it as a persulfate activator to enhance the removal of TCE from aqueous solutions. Devi et al. [28,29] also prepared two magnetic biochar composites, one with nZVI and the other with Ni-ZVI for efficiently adsorbing and dechlorinating pentachlorophenol in effluent. However, further studies of nZVI supported by different types of biochar are required to determine the ability to remove TCE in the contaminated groundwater.

In this study, the adsorption and dechlorination of TCE by biochar-supported nZVI (BC-nZVI) were investigated in comparison with that of the activated carbon supported nZVI (AC-nZVI). The effect factors on reactivity of the BC-nZVI composites were explored, including pH of solution, the presence of common anions and humic acids.

## Materials and methods

### Materials and chemicals

Wheat straw was purchased from a farmer in Lianyungang, Jiangsu Province, China. Commercial available activated carbon was obtained from the Shxh Carbon Corporation (Shanghai, China). Deionized water was obtained from East China University of Science and Technology (Shanghai, China). The oxygen was removed by purging with pure nitrogen gas. Ethanol (99.7%), ferrous sulfate heptahydrate (99.0%), sodium borohydride (96%), *n*-hexane (97.0%), hydroxylamine hydrochloride (98.5%), sodium acetate (99.0%), TCE (99.0%), sodium chloride (99.5%), sodium sulfate (99.0%), sodium nitrate (99.0%) and sodium bicarbonate (99.0%) were obtained from Lingfeng Chemical Reagent Co. Ltd. (Shanghai, China). Phenanthroline (99%) was obtained from Huzhen Chemical Technology Co., Ltd. (Shanghai, China). Sodium hydroxide (96%) and hydrochloric acid (30%) were obtained from Tianlian Chemical

Technology Co., Ltd. (Shanghai, China). Fulvic acid ( $\geq 90\%$ ) was obtained from Bailingwei Chemical Technology Co., Ltd. (Shanghai, China). All chemicals were analytical grade.

### Preparation of the BC-nZVI composite

Biochar was produced by pyrolyzing fresh wheat straw at  $600^\circ\text{C}$ . Briefly, wheat straw was ground and sieved to give a powder with particles with diameters  $< 1.0$  mm. The powdered material was pyrolyzed at  $600^\circ\text{C}$  for 2 h in a tube furnace with a nitrogen atmosphere. The heating rate was  $5^\circ\text{C}\cdot\text{min}^{-1}$ . Once the temperature reached  $600^\circ\text{C}$ , the temperature was maintained for 2 h to allow complete carbonization to occur. The biochar was cooled, treated with 1 M HCl for 12 h, and washed three times with deionized water (200 mL per 1 g biochar) to remove impurities. The cleaned biochar was dried at  $75^\circ\text{C}$  and stored in a drying chamber containing silica gel.

The nZVI particles were prepared by reducing  $\text{FeSO}_4\cdot 7\text{H}_2\text{O}$  with  $\text{NaBH}_4$ , following a procedure similar to Su et al. [30]. Critical conditions include excess  $\text{NaBH}_4$  to ensure thorough reduction of  $\text{Fe}^{2+}$  and 2:3 ratio of water to ethanol to ensure uniform nanoparticles. BC-nZVI was prepared by suspending 1.5 g biochar in 100 mL of 0.25 M  $\text{FeSO}_4\cdot 7\text{H}_2\text{O}$  in 2:3 (v/v) water: ethanol in a three-neck flask. The solution was stirred at 700 rpm. Particles of nZVI were deposited on biochar surfaces and in pores by adding, dropwise ( $2$  drops  $\cdot$  s $^{-1}$ ), 100 mL of 0.55 M  $\text{NaBH}_4$  (pH 11) with vigorous stirring. The mixture was stirred an additional 30 min. The resultant BC-nZVI was washed with deoxygenated deionized water three times to remove inorganic ions and with ethanol to remove the water, and stored in an anaerobic chamber. The whole process was carried out under a nitrogen atmosphere. The mass ratio of nZVI to biochar was approximately 1:1. The AC-nZVI was prepared in the same way.

### TCE removal kinetics

TCE removal experiments were conducted in a 150 rpm incubator shaker at room temperature ( $20\pm 1^\circ\text{C}$ ) in the dark. BC-nZVI, BC, AC-nZVI and AC were added ( $0.1$  g  $\cdot$  L $^{-1}$ ) to 100 mL serum bottles containing 100 mL aqueous solution including 30 mL TCE (pH 7.0). Each bottle was immediately sealed with a polytetrafluoroethylene stopper and an aluminum cap. Sample was collected using a glass syringe at each specified time interval and immediately passed through a 0.22 mm membrane filter. The filtered sample was analyzed by gas chromatography to determine the TCE concentration. TCE removal experiment was performed in triplicate to determine the reproducibility.

The TCE removal efficiency was determined:

$$\text{TCE removal efficiency (\%)} = \frac{C_{0,\text{TCE}} - C_{t,\text{TCE}}}{C_{0,\text{TCE}}} \times 100 \quad (1)$$

Because 1 mol of TCE contains 3 mol of  $\text{Cl}^-$ , the degradation efficiency of TCE was calculated:

$$\text{TCE dechlorination efficiency (\%)} = \frac{C_{0,\text{TCE}} - C_{t,\text{Cl}^-} \times 1.234}{C_{0,\text{TCE}}} \times 100 \quad (2)$$

In Eqs (1) and (2),  $C_{0,\text{TCE}}$  ( $\text{mg}\cdot\text{L}^{-1}$ ) was the initial concentration of TCE in the solution.  $C_{t,\text{TCE}}$  ( $\text{mg}\cdot\text{L}^{-1}$ ) was the TCE concentration in the solution at time t.  $C_{t,\text{Cl}^-}$  ( $\text{mg}\cdot\text{L}^{-1}$ ) was the  $\text{Cl}^-$  concentration in the solution at time t.  $C_{t,\text{Cl}^-} \times 1.234$  was determined from the equation  $\frac{C_{t,\text{Cl}^-}}{3 \times M_{\text{Cl}^-}} \times M_{\text{TCE}}$  and the term " $C_{t,\text{Cl}^-} \times 1.234$ " was the concentration of dechlorinated TCE (assuming 3 mol  $\text{Cl}^-$  was liberated for each mole of TCE dechlorinated) [31].

TCE removal kinetics followed a pseudo-first-order rate model and the rate constant was determined:

$$\frac{dC_{t,TCE}}{dt} = -k_{obs,TCE} C_{t,TCE} \quad (3)$$

$$\ln\left(\frac{C_{0,TCE}}{C_{t,TCE}}\right) = k_{obs,TCE} t \quad (4)$$

where  $C_0$  ( $\text{mg}\cdot\text{L}^{-1}$ ) was the initial TCE concentration in the solution.  $C_{t,TCE}$  ( $\text{mg}\cdot\text{L}^{-1}$ ) was the TCE concentration in the solution at time  $t$ .  $k_{obs,TCE}$  ( $\text{h}^{-1}$ ) was the removal rate constant and  $t$  was the reaction time.

### TCE determination

For analysis of aqueous TCE, a 0.5 mL sample was added in a 5 mL brown bottle containing 1.5 mL *n*-hexane. Then the bottle was placed on a vortex shaker at 2000 rpm for 3 min. For analysis of TCE adsorbed on the composite, the residual material was obtained by filtering the solution and immediately placed in 5 mL brown bottles containing 1.5 mL *n*-hexane and extracted for 5 min on a vortex shaker[31]. The TCE concentrations in the *n*-hexane extracts were determined by an Agilent 7890 gas chromatograph (Agilent Technologies, Santa Clara, CA, USA) equipped with an electron capture detector and a DB-VRX capillary column (60  $\text{m}\times 0.25\text{ mm}\times 1.4\text{ }\mu\text{m}$  film thickness; Agilent Technologies). Samples were injected at a 20:1 split ratio. Respective temperatures of the injection port and detector were 260°C and 240°C. The carrier gas was ultrapure nitrogen and the flow rate was 20  $\text{mL}\cdot\text{min}^{-1}$ . The temperature was programmed to increase from 45°C to 190°C at 12°C $\cdot\text{min}^{-1}$ , which was maintained for 2 min.

### Analysis methods

Surface area, total pore volume and pore diameter of BC-nZVI were measured using a Brunauer-Emmett-Teller (BET) analyzer (ASAP 2010; Micrometrics, Norcross, GA, USA). Surface morphology and surface elemental compositions of BC-nZVI were determined using a field emission-scanning electron microscope (S-3400N; Hitachi High-Technologies Corporation, Tokyo, Japan). The crystal structures and crystallinity of BC-nZVI before and after reaction were characterized by X-ray diffraction (D/MAX-2550 VB/PC; Rigaku, Tokyo, Japan) with a 10° to 80° scanning range. Surface functional groups were determined by Fourier transform infrared (FT-IR) spectrometry.

Concentrations of  $\text{Fe}^{2+}$  and  $\text{Fe}^{3+}$  in the aqueous phase were determined by UV spectrophotometer (UV1800; Shimadzu, Kyoto, Japan), using the phenanthroline method[32]. The  $\text{Cl}^-$  concentrations in the aqueous phase were determined by ion chromatography using an ICS 1000 system (Thermo Fisher Scientific, Waltham, MA, USA). The pH was measured with a pH electrode.

### Statistical analysis

Statistical analysis was performed using SPSS 20.0 software. An analysis of the data using analysis of variance (ANOVA) with between- and within-subject factors was conducted for each experiment. A repeated-measures ANOVA was conducted to analyze the TCE removal kinetics, with Time (0, 5, 15, 30, 60, 90, 160, 210 and 260 min) as the within-subjects factor and Group (control, nZVI, AC, BC, AC-nZVI and BC-nZVI) as the between-subjects factor. A

repeated-measures ANOVA was conducted to analyze the effect of pH on TCE removal, with Time (0, 5, 15, 30, 60, 90 and 160 min) as the within-subjects factor and pH (4.4, 5.7, 6.8 and 9.8) as the between-subjects factor. A repeated-measures ANOVA was conducted to analyze the effect of humic acid on TCE removal, with Time (0, 5, 15, 30, 60 and 90 min) as the within-subjects factor and HA concentration (0, 1, 5, 10, 40 and 80 mg·L<sup>-1</sup>) as the between-subjects factor. We further analyzed significant main effects and interactions ( $p < 0.05$ ) in the factorial ANOVAs using Least Significant Difference post hoc tests.

## Results and discussion

### Characterization of the BC-nZVI

The specific surface areas of BC-nZVI and AC-nZVI were smaller than those of biochar and activated carbon (Table 1). This was attributed to loaded nZVI which had a much lower surface area than BC or AC. Pore volumes of BC-nZVI and AC-nZVI also were smaller than those of BC or AC. The average pore diameter of BC-nZVI was sufficient for entry of TCE contaminants.

The surface morphologies of the biochar, fresh BC-nZVI and exhausted BC-nZVI are shown in Figure A in S1 File. It showed that the wheat straw biochar had a rough and porous surface (Figure A1 in S1 File), which provided the suitable sites to support nZVI. The nZVI particles that were immobilized on the biochar were well dispersed (Figure A2 in S1 File) and the biochar became a large sheet-like structure as a result of infiltration of water and stirring vigorously during preparation process. The nZVI particles dispersed on the biochar were hard to distinguish after reacting with TCE (Figure A3 in S1 File), because nZVI particles were oxidized during the reaction.

The major XRD peak at  $2\theta = 44.7^\circ$  in the XRD pattern of the fresh BC-nZVI (Fig 1) confirmed that ZVI had formed on the biochar surfaces [29]. Significant peaks at  $2\theta = 35^\circ$  and  $2\theta = 57^\circ$  appeared after the reaction with TCE, indicating the formation of magnetite (Fe<sub>3</sub>O<sub>4</sub>) on the nZVI surfaces. The peak at  $2\theta = 28.7^\circ$  was due to KCl contained in the biochar.

The FT-IR bands between 1500 cm<sup>-1</sup> and 1700 cm<sup>-1</sup> were attributed to C = C and C = O stretch vibrations (Figure B in S1 File). After the reaction with TCE, the sizes of the C = C and C = O peaks decreased, because TCE was adsorbed to the pore in BC-nZVI particles.

### TCE removal kinetics

More than 90% of TCE was removed within 200 min by BC-nZVI, AC-nZVI, BC and AC, while only about 55% of TCE was degraded by bare nZVI (Fig 2). Pseudo-first-order rate constants for TCE removal ( $k_{\text{obs,TCE}}$ ) were: BC-nZVI > AC-nZVI > BC > AC > nZVI. The repeated measures ANOVA showed significant effects of Time ( $F_{8,96} = 10523.9$ ,  $P < 0.01$ ) and Group ( $F_{5,12} = 756.1$ ,  $P < 0.01$ ) and a significant Time × Group interaction ( $F_{40,96} = 577.8$ ,  $P < 0.01$ ).

**Table 1. BET surface areas and pore volumes of the nZVI, biochar, activated carbon, BC-nZVI, and AC-nZVI.**

| Samples          | BET surface area                   | Total pore volume                   | Average pore diameter |
|------------------|------------------------------------|-------------------------------------|-----------------------|
|                  | (m <sup>2</sup> ·g <sup>-1</sup> ) | (cm <sup>3</sup> ·g <sup>-1</sup> ) | (nm)                  |
| nZVI             | 12.34                              | 0.04                                | -                     |
| biochar          | 155.7                              | 0.12                                | 8.4                   |
| Activated carbon | 1416.4                             | 0.93                                | 2.6                   |
| BC-nZVI          | 137.2                              | 0.11                                | 8.0                   |
| AC-nZVI          | 1002.7                             | 0.90                                | 4.1                   |

doi:10.1371/journal.pone.0172337.t001

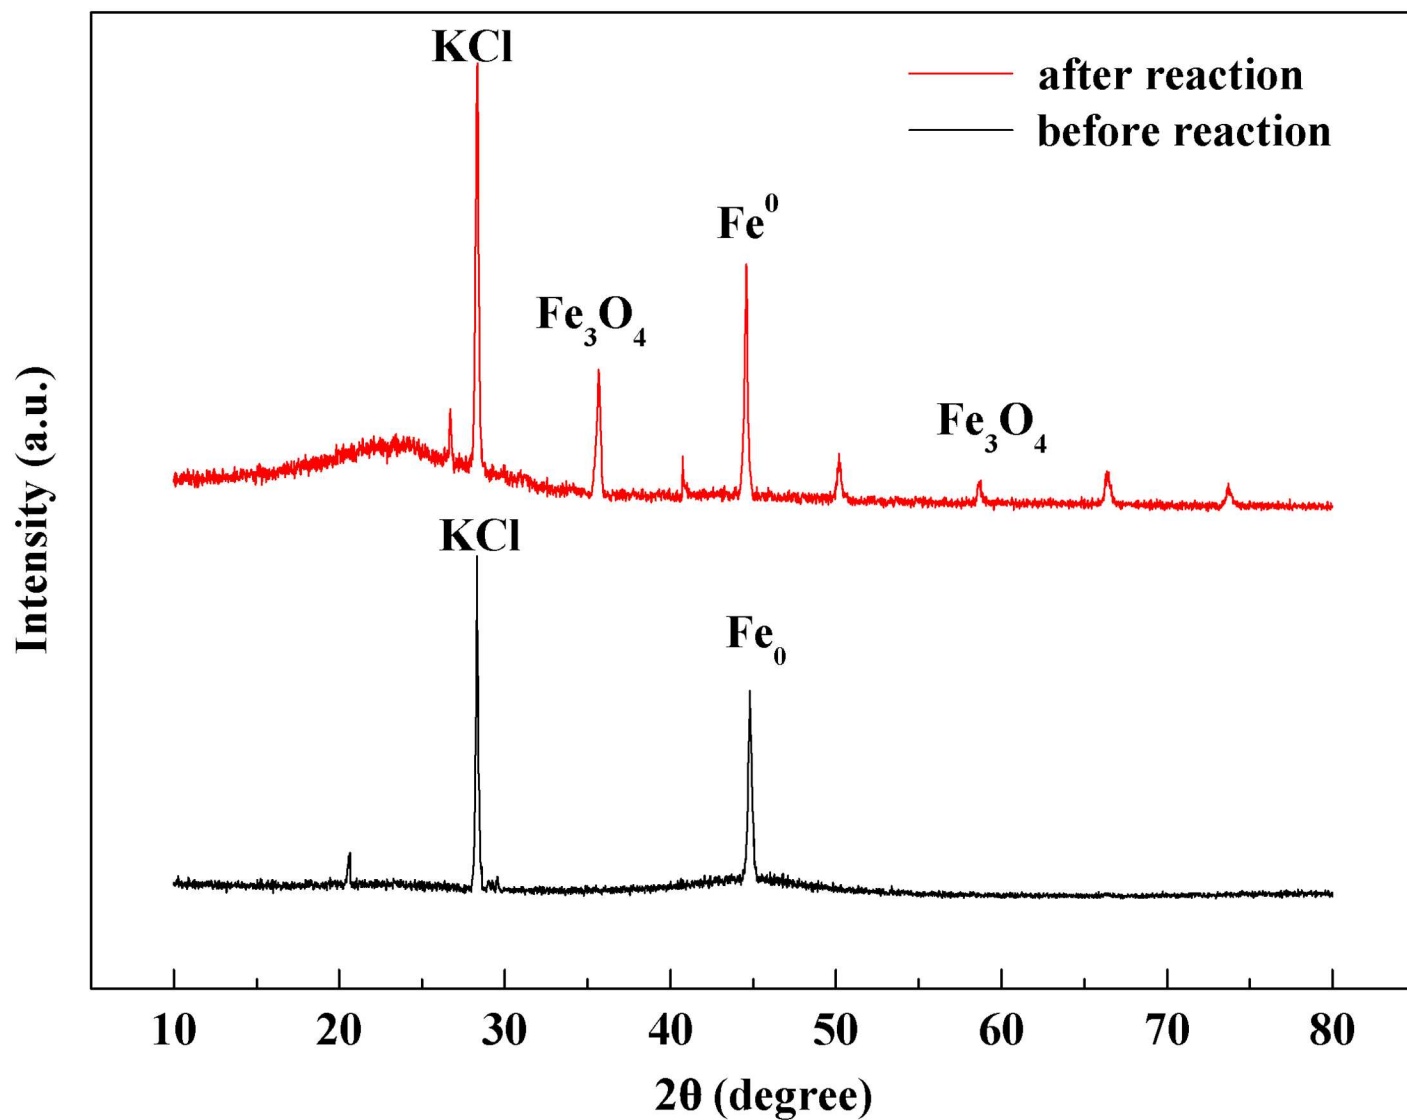

**Fig 1. X-ray diffractograms for BC-nZVI before and after reaction.**

doi:10.1371/journal.pone.0172337.g001

TCE removal was enhanced by supporting nZVI due to the greater adsorption capacity of the BC than the AC seems a usual finding. Biochar had a greater adsorption capacity than AC, attributable to its abundant pore structure.

More  $\text{Cl}^-$  was released from TCE in the aqueous phase by BC-nZVI and AC-nZVI than nZVI alone, showing better performance for TCE dechlorination. Chloride release was maximum when BC-nZVI was used, as a result of the greater adsorption capacity of biochar. Mass balance calculations revealed that 88% and 81% of TCE were absorbed by biochar and activated carbon, respectively, within 15 h. Only 11% of the TCE was dechlorinated by nZVI, while 79% and 62% of TCE were dechlorinated by BC-nZVI and AC-nZVI, respectively. Results indicated both adsorption and dechlorination during the removal process and the BC-nZVI composite exhibited superior performance. As were shown in [Table 1](#), the higher BET surface area of BC-nZVI and AC-nZVI than nZVI led to the higher adsorption performance



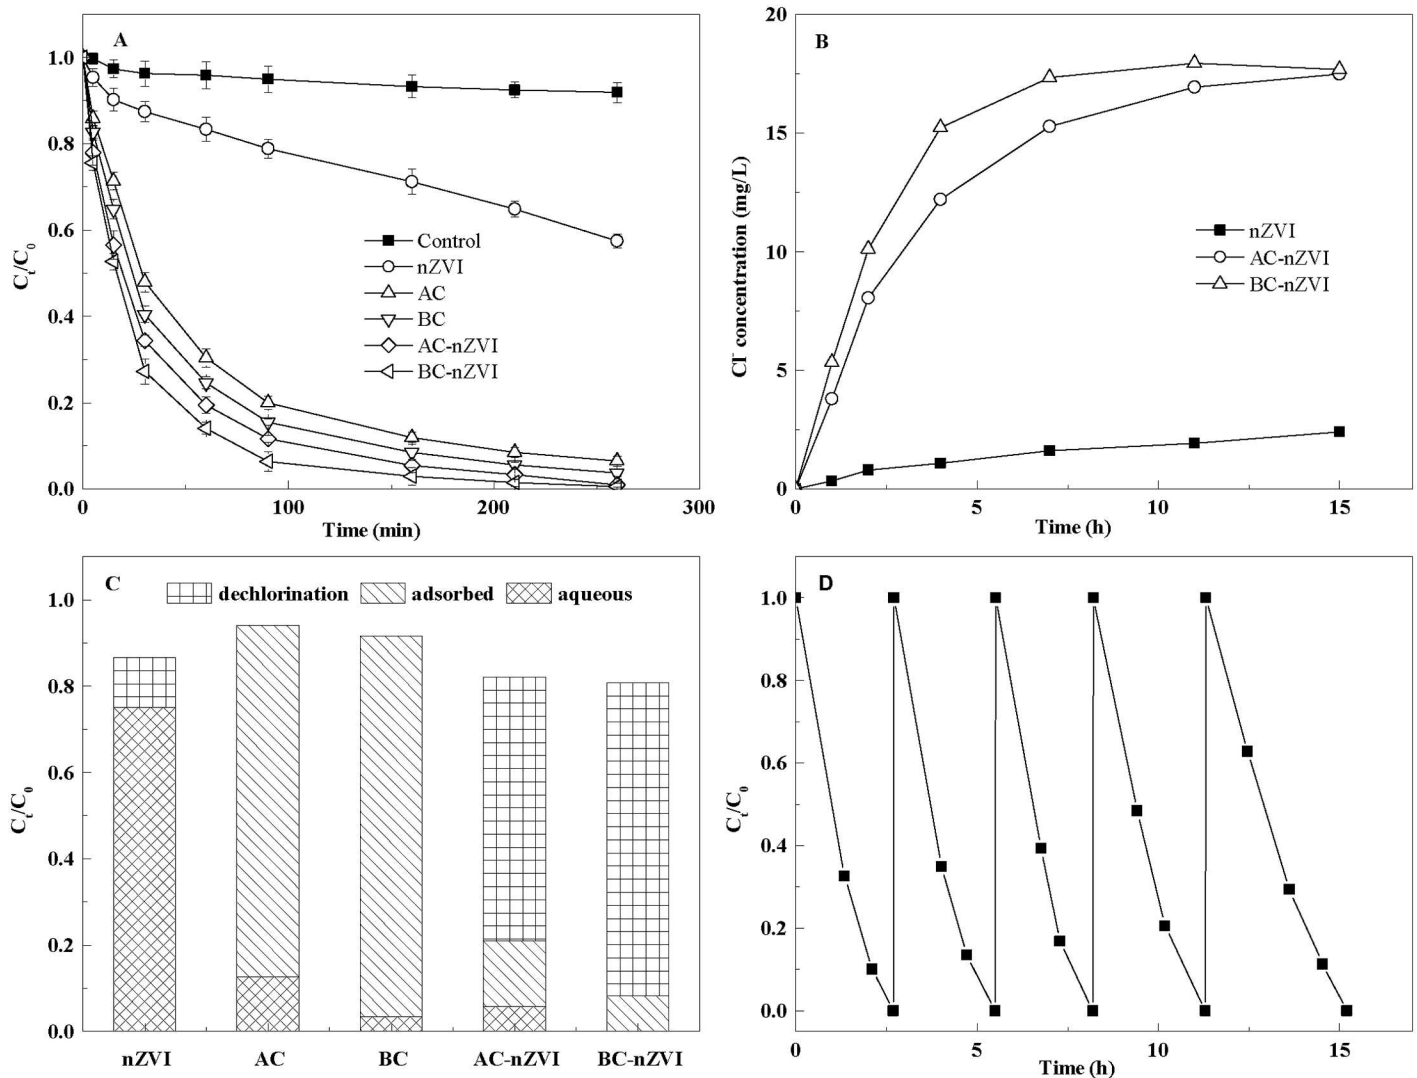

**Fig 2. Removal of TCE by the BC-nZVI composite.** **A**, TCE removal kinetics by BC-nZVI, AC-nZVI, nZVI, BC and AC; **B**, Changes in the  $Cl^-$  concentration during the TCE removal process; **C**, TCE mass balance taking into account sorbed, aqueous phase and dechlorinated TCE after 15 h; **D**, Removal of TCE by the BC-nZVI in the successive treatments.

doi:10.1371/journal.pone.0172337.g002

of them than nZVI alone. Further, the BC-nZVI and AC-nZVI composite decreased the aggregation of nZVI, which increased the dechlorination reactivity of nZVI.

The long-term performance of the BC-nZVI composite was evaluated by repeating TCE removal experiments in the solution. As is shown in Fig 3D, 30 mg·L<sup>-1</sup> TCE was removed by the BC-nZVI in a 2.7 h cycle. Almost 100% of the TCE can be removed even when the BC-nZVI was used in a fifth cycle, although the removal rate was slightly lower in the fourth cycle. The BC-nZVI therefore maintained its TCE removal efficiency for 15 h, indicating that the nZVI immobilized on the biochar exhibited high reactivity and stability during TCE removal.

### Effect of pH on TCE removal

TCE removal efficiency reached 90% at pH 4.4, 5.7 and 6.8, but was less efficient at pH 9.8 (Fig 3A). The highest removal rate appeared at pH 5.7, followed by the rate at pH 6.8. The rate

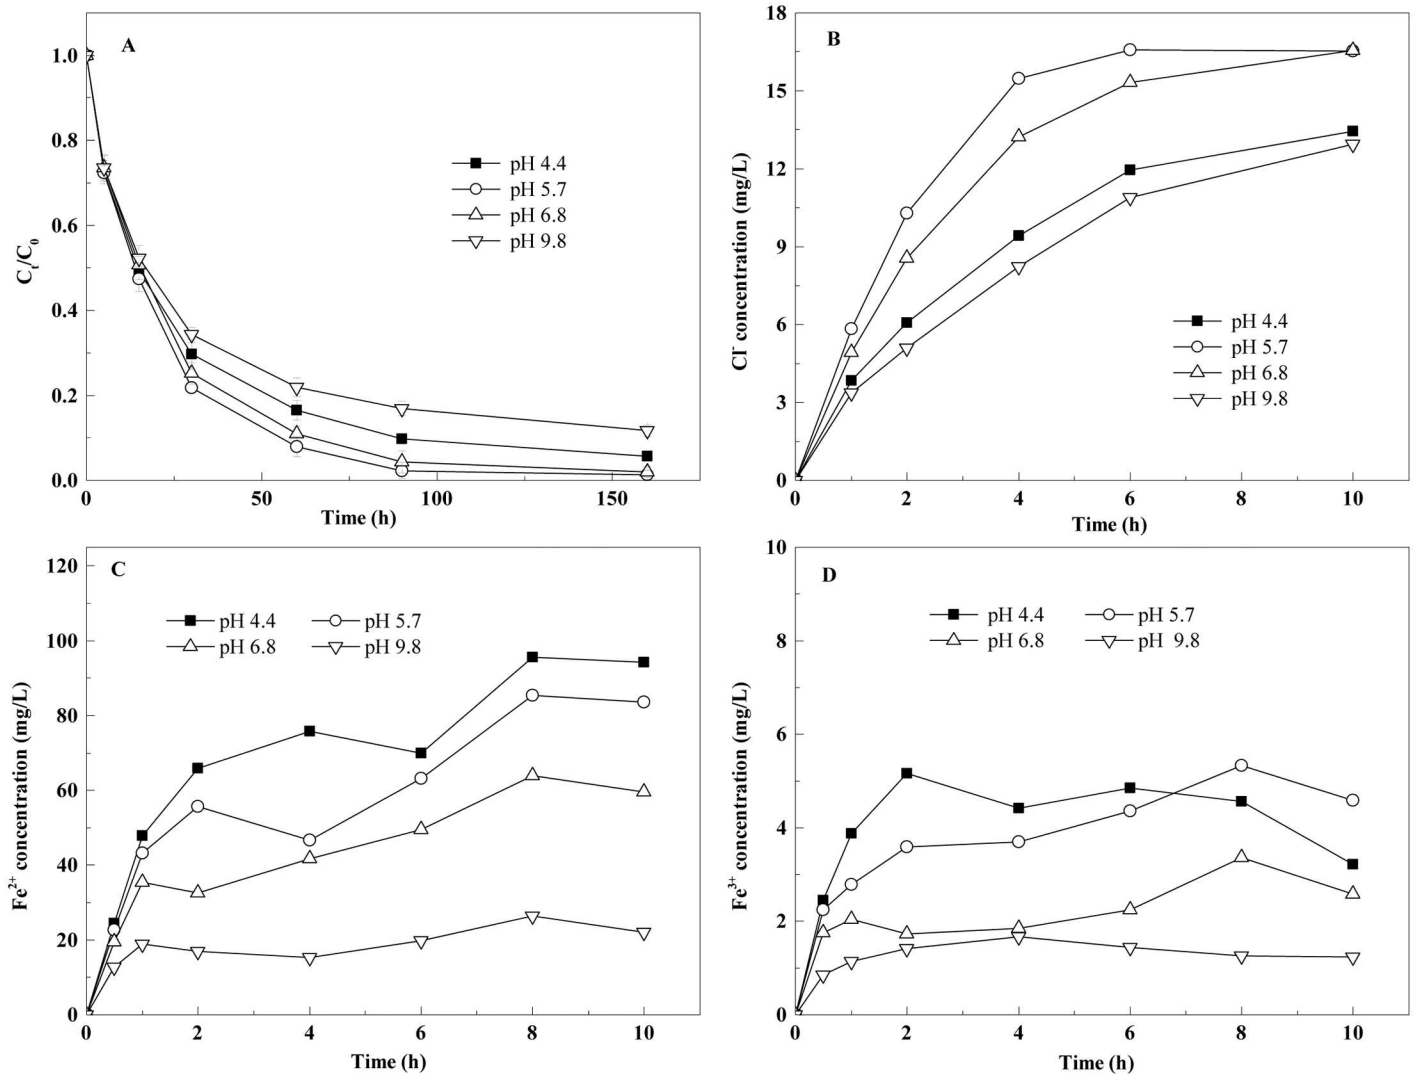

**Fig 3. Removal of TCE by the BC-nZVI with different initial pH values.** A, Effect of the initial solution pH on the removal of TCE by the BC-nZVI; B, Cl<sup>-</sup> concentrations in solutions with different initial pH values; C, Fe<sup>2+</sup> concentrations in solutions with different initial pH values; D, Fe<sup>3+</sup> concentrations in solutions with different initial pH values.

doi:10.1371/journal.pone.0172337.g003

constants ( $k_{obs,TCE}$ ) were in an order of pH 5.7 > pH 6.8 > pH 4.4 > pH 9.8. The repeated-measures ANOVA showed significant effects of Time ( $F_{6,48} = 9010.8, P < 0.01$ ), pH ( $F_{3,8} = 10.0, P < 0.01$ ) and significant interaction of Time  $\times$  pH ( $F_{18,48} = 14.4, P < 0.01$ ).

The initial pH of the solution significantly influenced the dechlorination of TCE by BC-nZVI (Fig 3B). A weakly acidic solution condition (pH 5.7–6.8) allowed TCE to be dechlorinated effectively. It was speculated that H<sup>+</sup> in a weakly acidic solution reacted with the iron oxide on the nZVI surfaces, thereby providing more and more reaction sites. However, the dechlorination efficiency decreased greatly at a lower pH (<4), because a large proportion of the nZVI reacted with H<sub>2</sub>O [33]. Less dechlorination under highly alkaline conditions (pH 9.8) was due to the accumulation of iron oxide on nZVI surfaces, which prevented the reaction of TCE with ZVI.



Changes in the concentrations of  $\text{Fe}^{2+}$  (Fig 3C) and  $\text{Fe}^{3+}$  (Fig 3D) in the solution were examined. The  $\text{Fe}^{2+}$  concentration increased when the initial pH decreased, which was not consistent with the dechlorination of TCE. It inferred that the  $\text{Fe}^{2+}$  in aqueous phase produced not only through the dechlorination of TCE by nZVI, but also through reactions between nZVI and water. The  $\text{Fe}^{3+}$  precipitated as  $\text{Fe}(\text{OH})_3$  and other iron oxides on the surface of nZVI, so the measurement of  $\text{Fe}^{3+}$  in solution was difficult because of the low solubility product constant ( $K_{\text{sp}}$ ) of  $\text{Fe}(\text{OH})_3$  at room temperature ( $1.1 \times 10^{-36}$ ).

### Effects of common inorganic anions on TCE removal

Effects of the anions ( $\text{Cl}^-$ ,  $\text{SO}_4^{2-}$ ,  $\text{NO}_3^-$  and  $\text{HCO}_3^-$ ) on TCE removal by BC-nZVI were evaluated (Figure C in S1 File and Table A in S1 File). Removal rate constants increased slightly with increasing  $\text{Cl}^-$  concentrations. Chloride might increase dechlorination by removing the oxide coating the nZVI[34].

All of the presence of  $\text{HCO}_3^-$ ,  $\text{SO}_4^{2-}$ , and  $\text{NO}_3^-$  decreased the reactivity of BC-nZVI. The rate constants decreased in the order of control >  $\text{HCO}_3^-$  >  $\text{SO}_4^{2-}$  >  $\text{NO}_3^-$ . The rate constant was smaller in the presence of 0.5 mM  $\text{HCO}_3^-$  than that without any anions, which attributed to the generation of carbonate precipitates on the surface of nZVI[35].  $\text{SO}_4^{2-}$  also negatively affected the BC-nZVI reactivity and the inhibition increased with concentration. Inhibition by  $\text{SO}_4^{2-}$  likely resulted from the formation of inner-sphere complex on the nZVI surface by  $\text{SO}_4^{2-}$ [36].  $\text{NO}_3^-$  exhibited the strongest inhibitive effect with the rate constant decreased to  $0.650 \text{ h}^{-1}$  when the  $\text{NO}_3^-$  concentration increased to 20 mM, which was much lower than that without any anions. Previous research has shown that  $\text{NO}_3^-$  reduced by obtaining electrons from the iron surface[37], thus the competition for reactive sites might contribute to the significant inhibition of  $\text{NO}_3^-$  to TCE removal by BC-nZVI.

### Effect of humic acid on TCE removal

Humic acid inhibited TCE removal by BC-nZVI (Fig 4A). The  $k_{\text{obs,TCE}}$  decreased with increasing HA concentration from 0–80  $\text{mg}\cdot\text{L}^{-1}$ . This observation was consistent with the previous study of Tseng et al. [31] that the HA competed with contaminants for reactive sites. The repeated-measures ANOVA showed significant effects of Time ( $F_{5,60} = 6522.3$ ,  $P < 0.01$ ) and HA concentration ( $F_{5,12} = 41.9$ ,  $P < 0.01$ ) and significant interaction of Time  $\times$  HA concentration ( $F_{25,60} = 28.2$ ,  $P < 0.01$ ). At a low HA concentration (0–1  $\text{mg}\cdot\text{L}^{-1}$ ), TCE dechlorination was similar to that without HA (Fig 4B), while the inhibition increased significantly when the HA concentration increased from 1 to 40  $\text{mg}\cdot\text{L}^{-1}$ . The high concentration of the HA likely blocked the biochar pores significantly to inhibit the adsorption and dechlorination of TCE by BC-nZVI. Interestingly, the inhibition decreased when the HA concentration was increased to 80  $\text{mg}\cdot\text{L}^{-1}$ . Humic acid molecules tended to aggregate at high concentrations (40–80  $\text{mg}\cdot\text{L}^{-1}$ ) and the aggregates might act as electron shuttles to enhance TCE dechlorination[38].

### Conclusions

Wheat straw biochar, an economical material, enhanced TCE removal and dechlorination by nZVI. TCE was likely removed by the BC-nZVI through a combination of adsorption by the biochar and subsequent dechlorination by the nZVI. A BC-nZVI composite was prepared that efficiently removed TCE at pH 5.7–6.8, in the presence of chloride, sulfate and bicarbonate anions, and at low HA concentrations. HA became inhibitory as concentration was increased, but HA aggregates appeared to facilitate dechlorination at the highest concentration tested. Nitrate had little effect at low concentrations but competed for electrons at higher concentrations. The mobility and lifetime of BC-nZVI should be investigated in subsurface environments

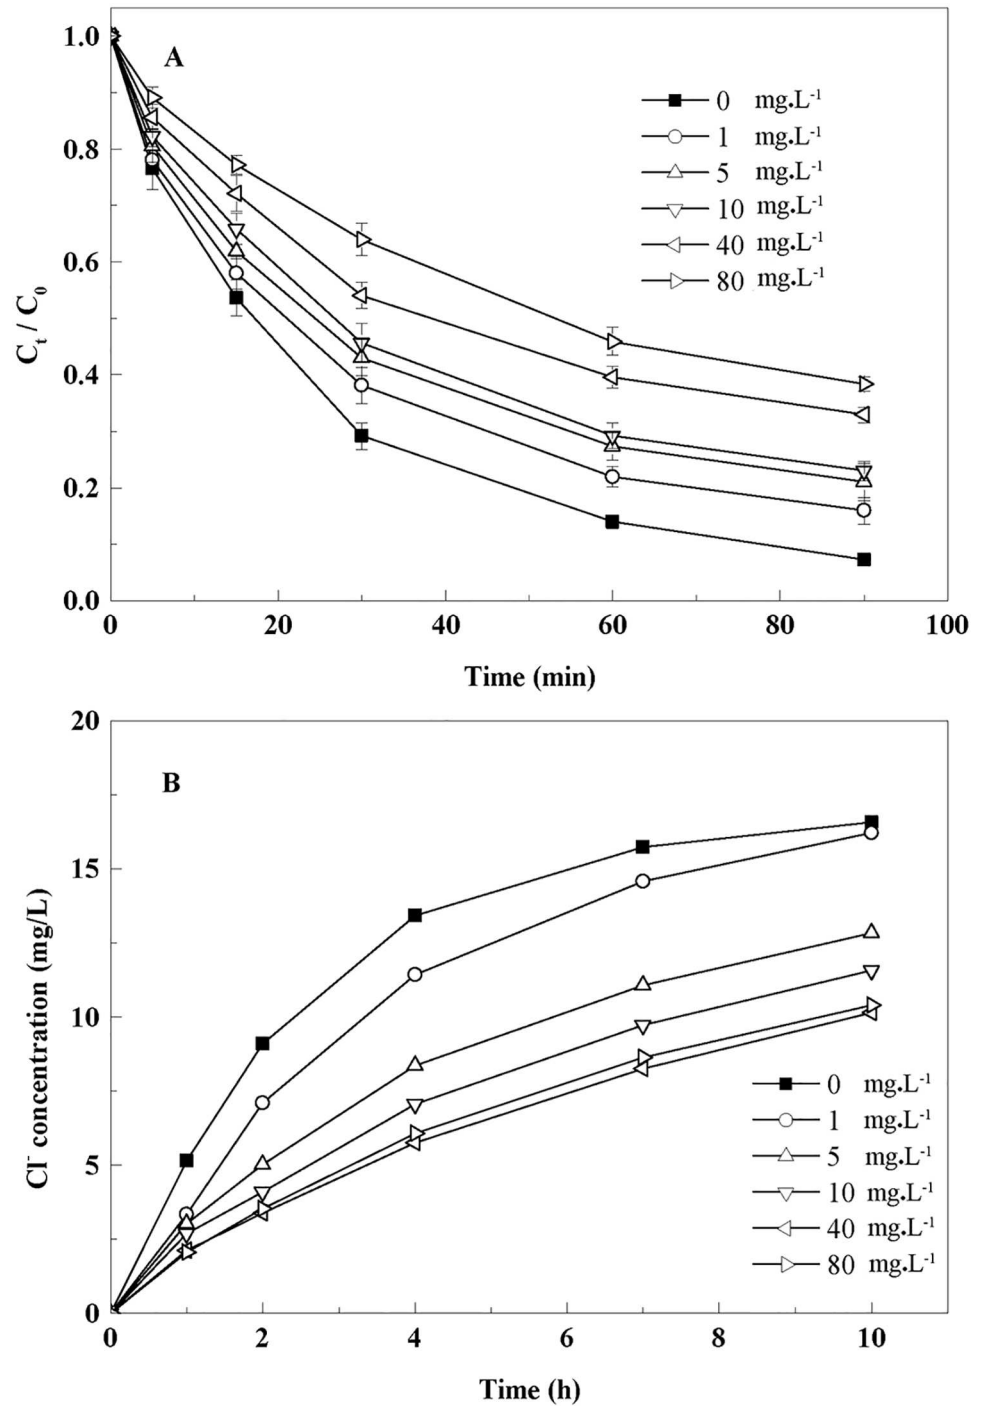

**Fig 4. Removal of TCE by the BC-nZVI in the presence of Humic Acid (HA).** **A**, Effect of HA on the removal of TCE by BC-nZVI at different HA concentrations; **B**, Cl<sup>-</sup> concentrations in solutions with different HA concentrations.

doi:10.1371/journal.pone.0172337.g004

and the effect on microbial activity needs to be evaluated. Because the nZVI particles could disrupt the membranes or alter membrane potential, microbial toxicity should be clear before underground injection. The present findings demonstrate the potential of the BC-nZVI for remediation of TCE-contaminated groundwater.

## Supporting information

**S1 File.** Figure A. SEM images of the (1) biochar, (2) fresh BC-nZVI and (3) exhausted BC-nZVI. Figure B. FT-IR spectra of the biochar, fresh BC-nZVI and exhausted BC-nZVI. Figure C. Removal of TCE by the BC-nZVI in the presence of different anions. Table A. Pseudo-first-order rate constants for the removal of TCE in the presence of different anions. (DOCX)

## Acknowledgments

This work was supported jointly by the National Natural Science Foundation of China (41273109, 51378208, and 51578240), the National key research and development plan (2016YFC0206200), the Program for New Century Excellent Talents in University (NCET-13-0797), the Fok Ying Tung Education Foundation (141077), the Innovation Program of the Shanghai Municipal Education Commission (14ZZ059), the Innovation Program of the Shanghai Municipal Science and Technology Commission (15DZ1205804), Fundamental Research Funds for the Central Universities (WB1313008, WB1516015, WB1616012). We also would like to thank the anonymous referees for their helpful comments on this paper.

## Author Contributions

**Conceptualization:** HL XLW YJY YQC.

**Data curation:** HL YQC.

**Formal analysis:** HL YQC.

**Funding acquisition:** HL.

**Investigation:** HL YQC.

**Methodology:** HL YQC XLD YFQ.

**Project administration:** HL XLW.

**Resources:** HL YJY XLD.

**Software:** HL YQC SG.

**Supervision:** HL XLW YJY YDL SG.

**Validation:** HL XLW YJY YDL.

**Visualization:** HL YQC.

**Writing – original draft:** HL YQC.

**Writing – review & editing:** HL YQC SC.

## References

1. Chiu WA, Jinot J, Scott CS, Makris SL, Cooper GS, Dzubow RC, et al. (2013) Human health effects of trichloroethylene: key findings and scientific issues. *Environ Health Perspect* 121: 303–311. doi: [10.1289/ehp.1205879](https://doi.org/10.1289/ehp.1205879) PMID: [23249866](https://pubmed.ncbi.nlm.nih.gov/23249866/)
2. Gillham RW, O'Hannensin SF (1994) Enhanced Degradation of Halogenated Aliphatics by Zero-Valent Iron. *Ground Water* 32: 958–967.
3. Busch J, Meissner T, Potthoff A, Oswald SE (2014) Investigations on mobility of carbon colloid supported nanoscale zero-valent iron (nZVI) in a column experiment and a laboratory 2D-aquifer test system. *Environ Sci Pollut Res Int* 21: 10908–10916. doi: [10.1007/s11356-014-3049-7](https://doi.org/10.1007/s11356-014-3049-7) PMID: [24859704](https://pubmed.ncbi.nlm.nih.gov/24859704/)

4. Noubactep C (2008) A critical review on the process of contaminant removal in Fe<sup>0</sup>-H<sub>2</sub>O systems. *Environ Technol* 29: 909–920. doi: [10.1080/09593330802131602](https://doi.org/10.1080/09593330802131602) PMID: [18724646](https://pubmed.ncbi.nlm.nih.gov/18724646/)
5. Crane RA, Scott TB (2012) Nanoscale zero-valent iron: future prospects for an emerging water treatment technology. *J Hazard Mater* 211–212: 112–125. doi: [10.1016/j.jhazmat.2011.11.073](https://doi.org/10.1016/j.jhazmat.2011.11.073) PMID: [22305041](https://pubmed.ncbi.nlm.nih.gov/22305041/)
6. Liu Y, Majetich SA, Tilton RD, Sholl DS, Lowry GV (2005) TCE dechlorination rates, pathways, and efficiency of nanoscale iron particles with different properties. *Environmental science & technology* 39: 1338–1345.
7. Guan X, Sun Y, Qin H, Li J, Lo IM, He D, et al. (2015) The limitations of applying zero-valent iron technology in contaminants sequestration and the corresponding countermeasures: the development in zero-valent iron technology in the last two decades (1994–2014). *Water Res* 75: 224–248. doi: [10.1016/j.watres.2015.02.034](https://doi.org/10.1016/j.watres.2015.02.034) PMID: [25770444](https://pubmed.ncbi.nlm.nih.gov/25770444/)
8. Fu F, Dionysiou DD, Liu H (2014) The use of zero-valent iron for groundwater remediation and wastewater treatment: a review. *J Hazard Mater* 267: 194–205. doi: [10.1016/j.jhazmat.2013.12.062](https://doi.org/10.1016/j.jhazmat.2013.12.062) PMID: [24457611](https://pubmed.ncbi.nlm.nih.gov/24457611/)
9. Busch J, Meissner T, Potthoff A, Bleyl S, Georgi A, Mackenzie K, et al. (2015) A field investigation on transport of carbon-supported nanoscale zero-valent iron (nZVI) in groundwater. *J Contam Hydrol* 181: 59–68. doi: [10.1016/j.jconhyd.2015.03.009](https://doi.org/10.1016/j.jconhyd.2015.03.009) PMID: [25864966](https://pubmed.ncbi.nlm.nih.gov/25864966/)
10. Velimirovic M, Simons Q, Bastiaens L (2014) Guar gum coupled microscale ZVI for in situ treatment of CAHs: continuous-flow column study. *J Hazard Mater* 265: 20–29. doi: [10.1016/j.jhazmat.2013.11.020](https://doi.org/10.1016/j.jhazmat.2013.11.020) PMID: [24333711](https://pubmed.ncbi.nlm.nih.gov/24333711/)
11. Chen MY, Su YF, Shih YH (2014) Effect of geochemical properties on degradation of trichloroethylene by stabilized zerovalent iron nanoparticle with Na-acrylic copolymer. *J Environ Manage* 144: 88–92. doi: [10.1016/j.jenvman.2014.04.024](https://doi.org/10.1016/j.jenvman.2014.04.024) PMID: [24929499](https://pubmed.ncbi.nlm.nih.gov/24929499/)
12. Kim HS, Ahn JY, Kim C, Lee S, Hwang I (2014) Effect of anions and humic acid on the performance of nanoscale zero-valent iron particles coated with polyacrylic acid. *Chemosphere* 113: 93–100. doi: [10.1016/j.chemosphere.2014.04.047](https://doi.org/10.1016/j.chemosphere.2014.04.047) PMID: [25065795](https://pubmed.ncbi.nlm.nih.gov/25065795/)
13. Fu R, Yang Y, Xu Z, Zhang X, Guo X, Bi D (2015) The removal of chromium (VI) and lead (II) from groundwater using sepiolite-supported nanoscale zero-valent iron (S-NZVI). *Chemosphere* 138: 726–734. doi: [10.1016/j.chemosphere.2015.07.051](https://doi.org/10.1016/j.chemosphere.2015.07.051) PMID: [26267258](https://pubmed.ncbi.nlm.nih.gov/26267258/)
14. Jia H, Wang C (2012) Adsorption and dechlorination of 2,4-dichlorophenol (2,4-DCP) on a multi-functional organo-smectite templated zero-valent iron composite. *Chemical Engineering Journal* 191: 202–209.
15. Kim H, Hong HJ, Jung J, Kim SH, Yang JW (2010) Degradation of trichloroethylene (TCE) by nanoscale zero-valent iron (nZVI) immobilized in alginate bead. *J Hazard Mater* 176: 1038–1043. doi: [10.1016/j.jhazmat.2009.11.145](https://doi.org/10.1016/j.jhazmat.2009.11.145) PMID: [20042289](https://pubmed.ncbi.nlm.nih.gov/20042289/)
16. Su YF, Cheng YL, Shih YH (2013) Removal of trichloroethylene by zerovalent iron/activated carbon derived from agricultural wastes. *J Environ Manage* 129: 361–366. doi: [10.1016/j.jenvman.2013.08.003](https://doi.org/10.1016/j.jenvman.2013.08.003) PMID: [23994578](https://pubmed.ncbi.nlm.nih.gov/23994578/)
17. Xiao J, Yue Q, Gao B, Sun Y, Kong J, Gao Y, et al. (2014) Performance of activated carbon/nanoscale zero-valent iron for removal of trihalomethanes (THMs) at infinitesimal concentration in drinking water. *Chemical Engineering Journal* 253: 63–72.
18. Paz-Ferreiro J, Lu H, Fu S, Méndez A, Gascó G (2014) Use of phytoremediation and biochar to remediate heavy metal polluted soils: a review. *Solid Earth* 5: 65–75.
19. Yang GX, Jiang H (2014) Amino modification of biochar for enhanced adsorption of copper ions from synthetic wastewater. *Water Res* 48: 396–405. doi: [10.1016/j.watres.2013.09.050](https://doi.org/10.1016/j.watres.2013.09.050) PMID: [24183556](https://pubmed.ncbi.nlm.nih.gov/24183556/)
20. Shih YH, Su YF, Ho RY, Su PH, Yang CY (2012) Distinctive sorption mechanisms of 4-chlorophenol with black carbons as elucidated by different pH. *Sci Total Environ* 433: 523–529. doi: [10.1016/j.scitotenv.2012.06.050](https://doi.org/10.1016/j.scitotenv.2012.06.050) PMID: [22842752](https://pubmed.ncbi.nlm.nih.gov/22842752/)
21. Taha SM, Amer ME, Elmarsafy AE, Elkady MY (2014) Adsorption of 15 different pesticides on untreated and phosphoric acid treated biochar and charcoal from water. *Journal of Environmental Chemical Engineering* 2: 2013–2025.
22. Ahmad M, Lee SS, Oh SE, Mohan D, Moon DH, Lee YH, et al. (2013) Modeling adsorption kinetics of trichloroethylene onto biochars derived from soybean stover and peanut shell wastes. *Environ Sci Pollut Res Int* 20: 8364–8373. doi: [10.1007/s11356-013-1676-z](https://doi.org/10.1007/s11356-013-1676-z) PMID: [23608978](https://pubmed.ncbi.nlm.nih.gov/23608978/)
23. Ahmad M, Lee SS, Dou X, Mohan D, Sung JK, Yang JE, et al. (2012) Effects of pyrolysis temperature on soybean stover- and peanut shell-derived biochar properties and TCE adsorption in water. *Bioresour Technol* 118: 536–544. doi: [10.1016/j.biortech.2012.05.042](https://doi.org/10.1016/j.biortech.2012.05.042) PMID: [22721877](https://pubmed.ncbi.nlm.nih.gov/22721877/)

24. Ahmad M, Lee SS, Rajapaksha AU, Vithanage M, Zhang M, Cho JS, et al. (2013) Trichloroethylene adsorption by pine needle biochars produced at various pyrolysis temperatures. *Bioresour Technol* 143: 615–622. doi: [10.1016/j.biortech.2013.06.033](https://doi.org/10.1016/j.biortech.2013.06.033) PMID: [23838320](https://pubmed.ncbi.nlm.nih.gov/23838320/)
25. Yan J, Han L, Gao W, Xue S, Chen M (2015) Biochar supported nanoscale zerovalent iron composite used as persulfate activator for removing trichloroethylene. *Bioresour Technol* 175: 269–274. doi: [10.1016/j.biortech.2014.10.103](https://doi.org/10.1016/j.biortech.2014.10.103) PMID: [25459832](https://pubmed.ncbi.nlm.nih.gov/25459832/)
26. Zhou Y, Gao B, Zimmerman AR, Cao X (2014) Biochar-supported zerovalent iron reclaims silver from aqueous solution to form antimicrobial nanocomposite. *Chemosphere* 117: 801–805. doi: [10.1016/j.chemosphere.2014.10.057](https://doi.org/10.1016/j.chemosphere.2014.10.057) PMID: [25461951](https://pubmed.ncbi.nlm.nih.gov/25461951/)
27. Zhou Y, Gao B, Zimmerman AR, Chen H, Zhang M, Cao X (2014) Biochar-supported zerovalent iron for removal of various contaminants from aqueous solutions. *Bioresour Technol* 152: 538–542. doi: [10.1016/j.biortech.2013.11.021](https://doi.org/10.1016/j.biortech.2013.11.021) PMID: [24300585](https://pubmed.ncbi.nlm.nih.gov/24300585/)
28. Devi P, Saroha AK (2014) Synthesis of the magnetic biochar composites for use as an adsorbent for the removal of pentachlorophenol from the effluent. *Bioresour Technol* 169: 525–531. doi: [10.1016/j.biortech.2014.07.062](https://doi.org/10.1016/j.biortech.2014.07.062) PMID: [25089893](https://pubmed.ncbi.nlm.nih.gov/25089893/)
29. Devi P, Saroha AK (2015) Simultaneous adsorption and dechlorination of pentachlorophenol from effluent by Ni—ZVI magnetic biochar composites synthesized from paper mill sludge. *Chemical Engineering Journal* 271: 195–203.
30. Su YF, Hsu CY, Shih YH (2012) Effects of various ions on the dechlorination kinetics of hexachlorobenzene by nanoscale zero-valent iron. *Chemosphere* 88: 1346–1352. doi: [10.1016/j.chemosphere.2012.05.036](https://doi.org/10.1016/j.chemosphere.2012.05.036) PMID: [22704216](https://pubmed.ncbi.nlm.nih.gov/22704216/)
31. Tseng HH, Su JG, Liang C (2011) Synthesis of granular activated carbon/zero valent iron composites for simultaneous adsorption/dechlorination of trichloroethylene. *J Hazard Mater* 192: 500–506. doi: [10.1016/j.jhazmat.2011.05.047](https://doi.org/10.1016/j.jhazmat.2011.05.047) PMID: [21676545](https://pubmed.ncbi.nlm.nih.gov/21676545/)
32. Li FB, Li XM, Zhou SG, Zhuang L, Cao F, Huang DY, et al. (2010) Enhanced reductive dechlorination of DDT in an anaerobic system of dissimilatory iron-reducing bacteria and iron oxide. *Environ Pollut* 158: 1733–1740. doi: [10.1016/j.envpol.2009.11.020](https://doi.org/10.1016/j.envpol.2009.11.020) PMID: [20031285](https://pubmed.ncbi.nlm.nih.gov/20031285/)
33. Rajajayavel SRC, Ghoshal S (2015) Enhanced reductive dechlorination of trichloroethylene by sulfidated nanoscale zero valent iron. *Water Research*.
34. Gotpagar J, Lyuksyutov S, Cohn R (1999) Reductive Dehalogenation of Trichloroethylene with Zero-Valent Iron: Surface Profiling Microscopy and Rate Enhancement Studies. *Langmuir* 15: 8412–8420.
35. Liu Yueqinang Pa T L GV (2007) Effect of TCE Concentration and Dissolved Groundwater Solutes on NZVI-Promoted TCE Dechlorination and H<sub>2</sub> Evolution. *Environ Sci Technol* 41: 7881–7887. PMID: [18075103](https://pubmed.ncbi.nlm.nih.gov/18075103/)
36. Su C, Puls RW (2004) Nitrate reduction by zerovalent iron: effects of formate, oxalate, citrate, chloride, sulfate, borate, and phosphate. *Environmental science & technology* 38: 2715–2720.
37. Sohn Kyounghee K SW, Ahn Samyoung, Woo Myungwu and Yang Seong Koo (2006) Fe(0) nanoparticles for nitrate reduction: stability, reactivity, and transformation. *Environ Sci Technol* 40: 5514–5519. PMID: [16999133](https://pubmed.ncbi.nlm.nih.gov/16999133/)
38. Tsang DC, Graham NJ, Lo IM (2009) Humic acid aggregation in zero-valent iron systems and its effects on trichloroethylene removal. *Chemosphere* 75: 1338–1343. doi: [10.1016/j.chemosphere.2009.02.058](https://doi.org/10.1016/j.chemosphere.2009.02.058) PMID: [19327814](https://pubmed.ncbi.nlm.nih.gov/19327814/)
